# Supplementary material for: A unique aspartyl protease gene expansion in Talaromyces marneffei plays a role in growth inside host phagocytes
Source: PubMed Central journal article supplement (PMC6527018; doi:10.1080/21505594.2019.1593776), 2019-04-11
Supplement: kvir-10-01-1593776-s001.pdf [file kvir-10-01-1593776-s001.pdf]

A

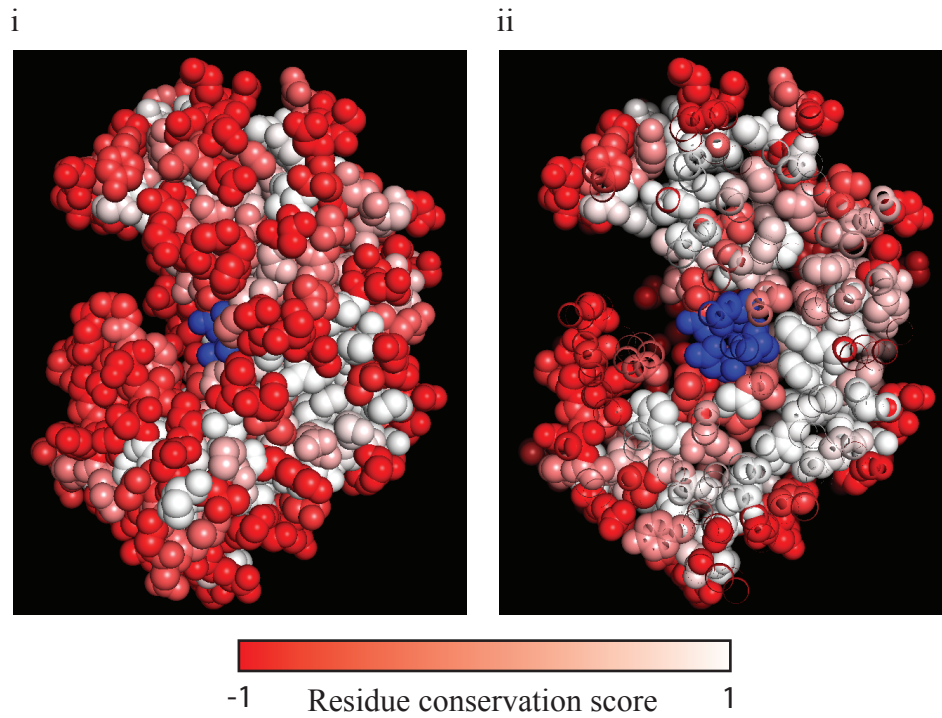

B

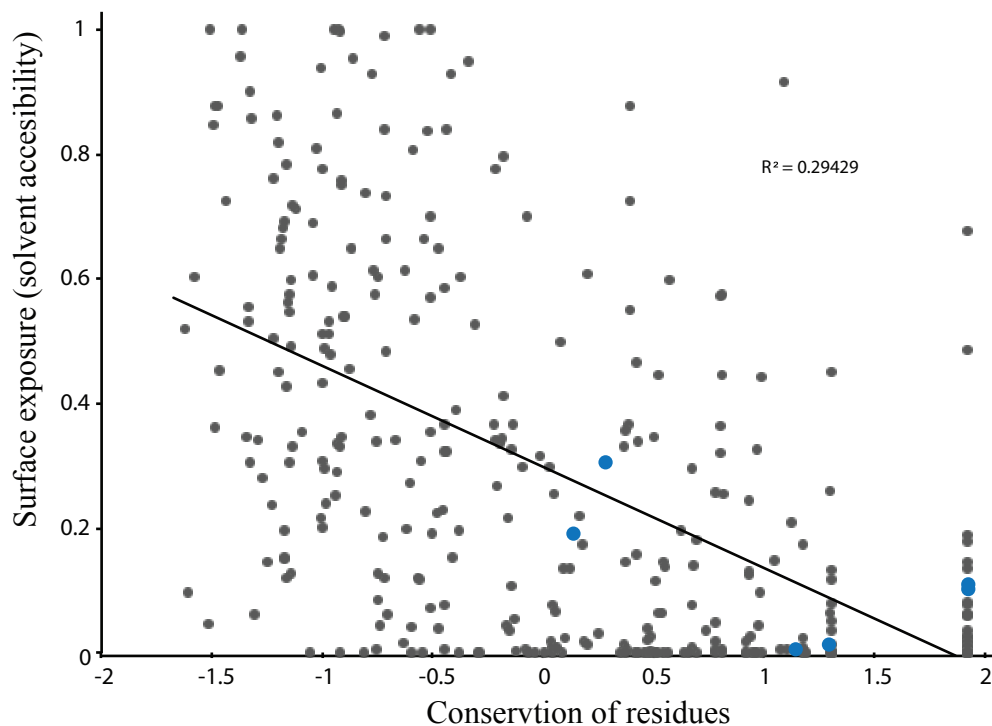

### Supplementary Figure 1. Surface residues of the Pop expansion are less conserved.

**A.** Conservation of amino acid residues within the Pop expansion were mapped onto the structure of the *Aspergillus oryzae* PepA orthologue using pyMol, allowing visualisation of the relative position of less conserved residues in the protein structure. (i). Surface view of amino acid conservation. (ii). Cross section of structure showing increased conservation of interior residues. Blue regions are conserved 'DTG' catalytic motifs. Gradient from red to white (showing increasing conservation amongst amino acid residues in Pop proteins).

**B.** Scatterplot of surface exposure (measured by simulated solvent accessibility) compared to conservation of amino acid residues. Higher solvent accessibility score represents greater surface exposure. Residues in blue are the two 'DTG' catalytic motifs with the most conserved pair being the catalytic aspartate residues. This plot shows that a decrease in conservation is correlated with reduced surface exposure.

A

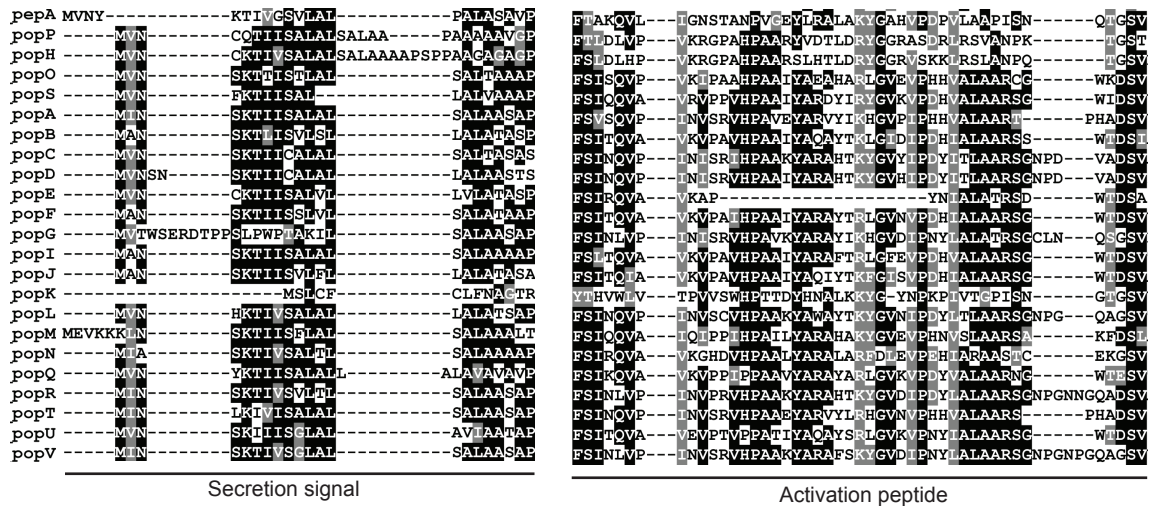

B

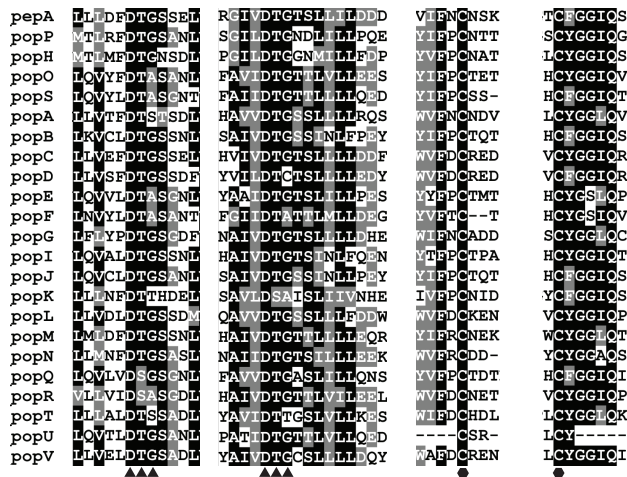

**Supplementary Figure 2. Protein sequence alignment of aspartyl protease family in *T. marneffei*.**

A. Alignment of the amino terminal end of the predicted *pop* gene products showing the conservation of the pre-pro peptide signal that is necessary for secretion.

B. The N- and C-terminal active sites, represented by the motifs DTG or DSG, are also conserved. The DTG/DSG motifs (denoted by ▲) contain essential aspartic amino acid residues. Two conserved cysteine residues that are essential for the formation of the C-terminal disulfide bridge are also conserved (denoted by ●).

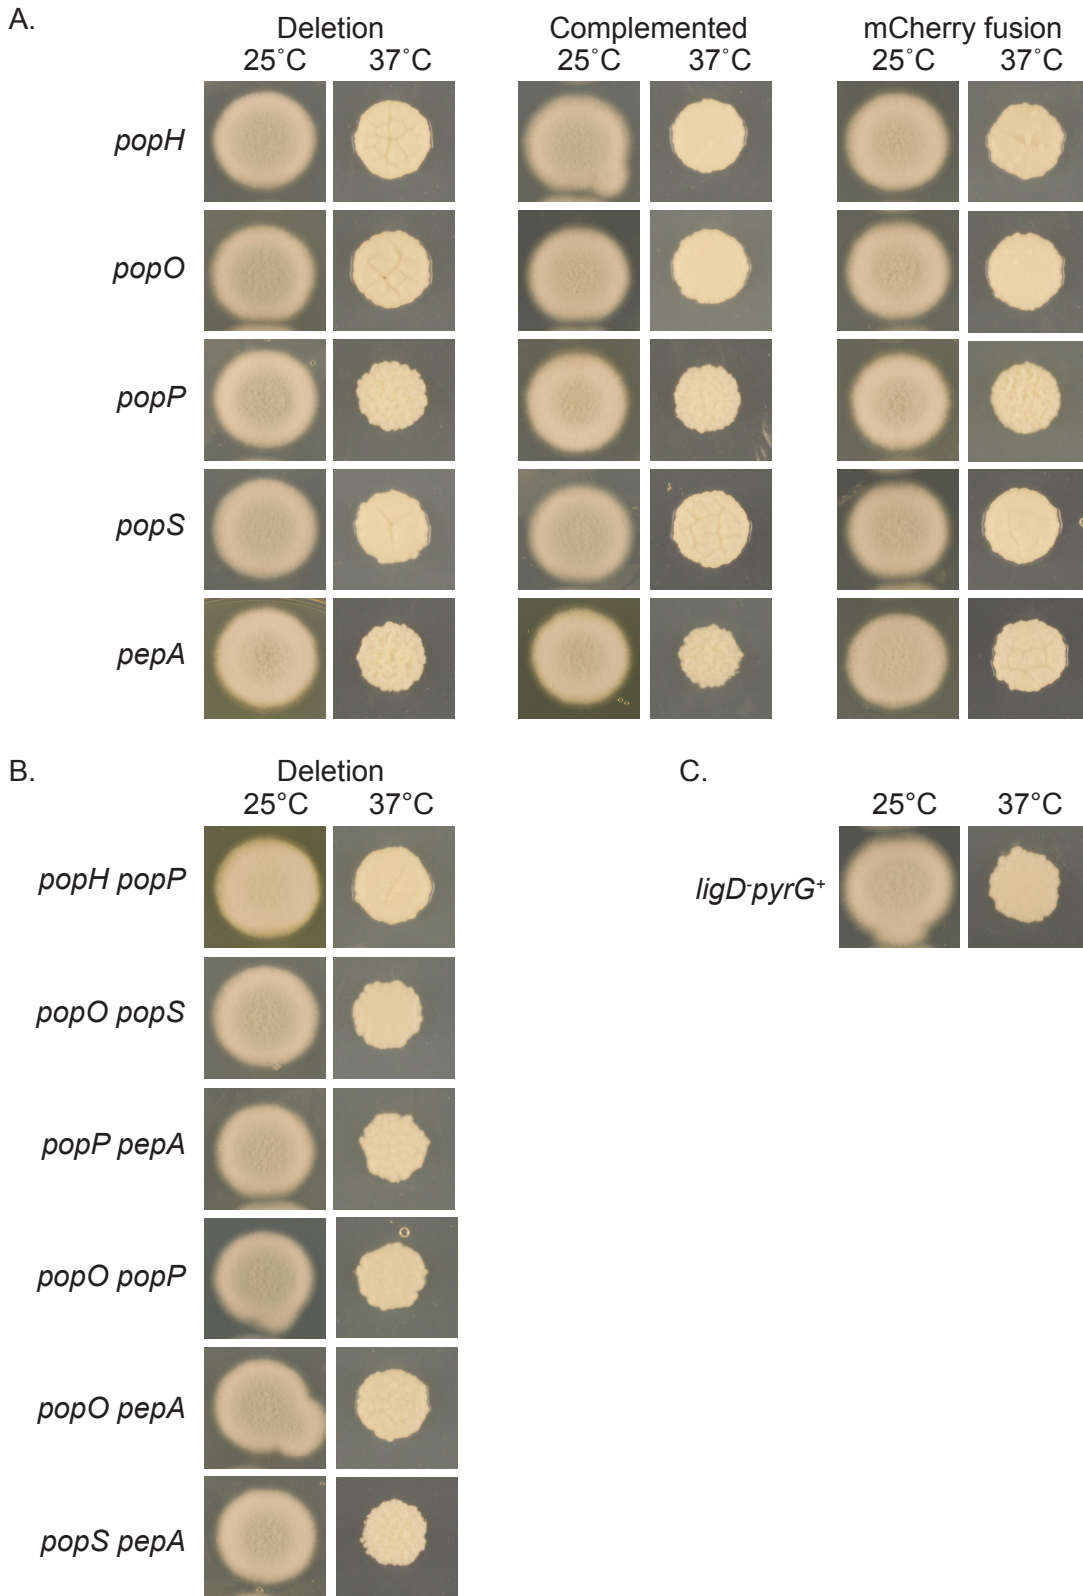

**Supplementary Figure 3. Growth of the various genetically modified *pop* strains**

Strains were grown for 7 days at 25°C on ANM medium for hyphal growth and 37°C on SD medium for yeast growth.

**A.** Growth of strains with single gene deletions, complemented derivatives of the deletion strains using the wild type allele and complemented derivatives of the deletion strains using the wild type allele fused to the mCherry gene .

**B.** Growth of strains with double gene deletions of the various genes.

**C.** Growth of the parental strain used to generate all of the transgenic strains in A and B.

No phenotypic differences was noted between any transgenic strain and the parental strain. *ligD::pyrG<sup>+</sup>*.

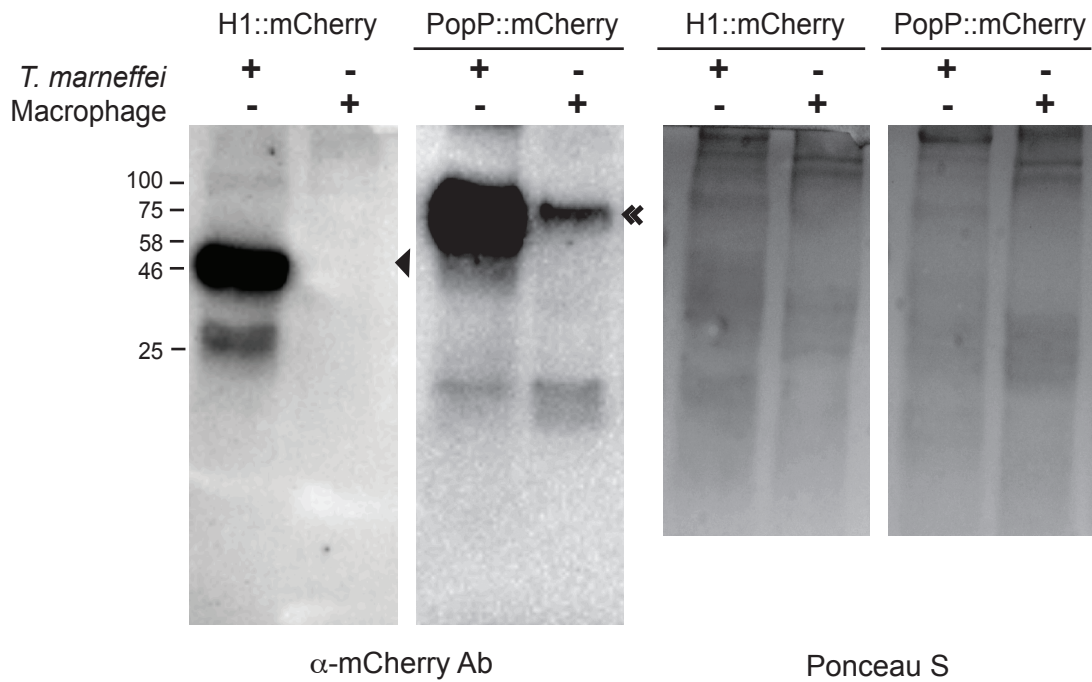

**Supplementary Figure 4. Cellular localisation of *T. marneffeii* mCherry fusion proteins after infection of macrophages.**

J774 macrophages were infected with *T. marneffeii* strains carrying either the H1::mCherry or PopP::mCherry fusion construct, grown for 24 hours and cell protein extracts prepared from the internalised *T. marneffeii* yeast cells and the remaining macrophage cell lysates. Western blot analysis using a primary rat anti-mCherry monoclonal antibody ( $\alpha$ -mCherry Ab) and secondary anti-rat IgG horseradish peroxidase (HRP)-linked antibody is shown. Molecular mass markers are depicted on the left hand side in kDa. Ponceau S staining was used to check for equivalent loading of proteins for western blot analysis (right hand panels). The *T. marneffeii* H1::mCherry fusion protein (~40 kDa) was only detected in *T. marneffeii* fraction and not in J774 macrophage fraction (filled arrowhead). The *T. marneffeii* PopP::mCherry fusion protein (~72 kDa) was detected in both the *T. marneffeii* yeast and J774 macrophage fractions (double arrowhead). The PopP::mCherry protein appears more abundant in the *T. marneffeii* yeast cell fraction although this may not truly reflect abundance due to the the highly disparate protein composition of the two extracts.



**Supplementary Table 1: Similarity of *A. fumigatus* Pep1 to the aspartyl proteases of *T. marneffe***

| <b>Protein <sup>a</sup></b> | <b>e-value</b> | <b>Percentage identity</b> | <b>Score</b> |
|-----------------------------|----------------|----------------------------|--------------|
| PepA                        | 2.00E-118      | 47.65                      | 885          |
| PopC                        | 9.00E-105      | 43.92                      | 794          |
| PopR                        | 6.00E-100      | 43.49                      | 762          |
| PopD                        | 3.00E-99       | 43.35                      | 757          |
| PopM                        | 3.00E-98       | 44.44                      | 751          |
| PopL                        | 9.00E-97       | 44.95                      | 741          |
| PopG                        | 2.00E-94       | 42.24                      | 726          |
| PopS                        | 5.00E-91       | 42.02                      | 702          |
| PopF                        | 7.00E-91       | 40.56                      | 701          |
| PopB                        | 2.00E-90       | 38.15                      | 699          |
| PopI                        | 5.00E-90       | 40.11                      | 696          |
| PopK                        | 4.00E-89       | 43.14                      | 689          |
| PopA                        | 4.00E-89       | 40.37                      | 690          |
| PopJ                        | 4.00E-89       | 38.56                      | 690          |
| PopT                        | 1.00E-87       | 39.73                      | 680          |
| PopV                        | 4.00E-87       | 40.63                      | 677          |
| PopP                        | 2.00E-85       | 38.32                      | 665          |
| PopN                        | 2.00E-84       | 40.7                       | 658          |
| PopH                        | 3.00E-84       | 39.26                      | 658          |
| PopQ                        | 7.00E-84       | 40.92                      | 655          |
| PopE                        | 4.00E-79       | 39.39                      | 621          |
| PopO                        | 2.00E-78       | 36.7                       | 618          |
| PopU                        | 4.00E-59       | 37.18                      | 481          |

<sup>a</sup> – Similarity is based on BLASTp e-value, identity and scores, and the genes are sorted by similarity.

**Supplementary Table 2: Primers used in this study**

| <b>Primer ID</b> | <b>Primer sequence</b>                               |
|------------------|------------------------------------------------------|
| QQ100            | ACCAGGTGTCGATCAGCTTT                                 |
| QQ75             | GCGTACGGGTTCTGGAAAAG                                 |
| QQ76             | CTGACCATGGCGTTTGTGTA                                 |
| QQ81             | TGCATGTAACTGTGTATGGGTGT                              |
| QQ82             | CAGGTGCATTTTTCTTACGATG                               |
| QQ83             | GGGGACCCAGCTTTCTTGTACAAAGTGGTTCTAATATCGGCCCATCACC    |
| QQ84             | GGGGAGCCTGCTTTTTTGTACAAACTTGTGATTGTGGAACAAAACATTGCT  |
| QQ87             | GGAACAATGGCTTGAAGAGG                                 |
| QQ88             | TAGGGCGAGTTTAACGATCC                                 |
| QQ89             | GGGGACCCAGCTTTCTTGTACAAAGTGGTTGGACTAATTGATTGAATGAACG |
| QQ90             | GGGGAGCCTGCTTTTTTGTACAAACTTGTGTTCGGTTCTACACGGTCCAA   |
| QQ93             | GTGACAGGCTGGCTGTTCT                                  |
| QQ94             | GCACTGAAACCCCAACACTT                                 |
| QQ95             | GGGGACCCAGCTTTCTTGTACAAAGTGGTTTTTTCAAGCCTGCACTTCC    |
| QQ96             | GGGGAGCCTGCTTTTTTGTACAAACTGTAGGAACTGGGCCGTTAGACT     |
| QQ98             | GCCGAAGGTCAACAACAAAG                                 |
| QQ99             | ACAATTGGCGCGATATGATT                                 |
| RR1              | GGGGACCCAGCTTTCTTGTACAAAGTGGTATAGCAGGAACGGAGGGAGT    |
| XX17             | TTTTACTAGTGGCCTGGGCCGCGATACCGAT                      |
| XX18             | TTTTACTAGTGGCCTTGGTGGCGAAACCAAC                      |
| XX19             | TTTTACTAGTGGCCTTGATGGCGAAGCCAAC                      |
| XX20             | TTTTTCTAGAAGCCTGAGCAGCCAAACCAAT                      |

**Supplementary Table 3: *T. marneffei* strains used in this study.**

| <b>Strain ID</b> | <b>Full Genotype</b>                                         | <b>Origin</b>                 |
|------------------|--------------------------------------------------------------|-------------------------------|
| G809             | <i>ΔligD::pyrG niaD1 pyrG1</i>                               | (Bugeja <i>et al.</i> , 2012) |
| G816             | <i>ΔligD::pyrG niaD1 pyrG1</i>                               | (Bugeja <i>et al.</i> , 2012) |
| G829             | <i>ΔligD::pyrG ΔriboB::pyrG niaD1 pyrG1</i>                  | (Bugeja <i>et al.</i> , 2012) |
| G994             | G816, <i>ΔpopH::pyrG</i>                                     | This study                    |
| G995             | G816, <i>ΔpopH::pyrG [niaD<sup>t</sup> popH]</i>             | This study                    |
| G996             | G816, <i>ΔpopH::pyrG [niaD<sup>t</sup> popH::mCherry]</i>    | This study                    |
| G997             | G816, <i>ΔpopO::pyrG</i>                                     | This study                    |
| G998             | G816, <i>ΔpopO::pyrG [niaD<sup>t</sup> popO<sup>+</sup>]</i> | This study                    |
| G999             | G829, <i>ΔpopP::riboB</i>                                    | This study                    |
| G1000            | G829, <i>ΔpopP::riboB [niaD<sup>t</sup> popP]</i>            | This study                    |
| G1001            | G829, <i>ΔpopP::riboB [niaD<sup>t</sup> popP::mCherry]</i>   | This study                    |
| G1002            | G809, <i>ΔpopS::bar</i>                                      | This study                    |
| G1003            | G809, <i>ΔpopS::bar [niaD<sup>t</sup> popP]</i>              | This study                    |
| G1004            | G816, <i>ΔpepA::pyrG</i>                                     | This study                    |
| G1005            | G816, <i>ΔpepA::pyrG [niaD<sup>t</sup> pepA]</i>             | This study                    |
| G1006            | G816, <i>ΔpepA::pyrG [niaD<sup>t</sup> pepA::mCherry]</i>    | This study                    |
| G1007            | <i>ΔligD ΔriboB niaD1 pyrG1 ΔpopP::riboB ΔpopH::pyrG</i>     | This study                    |
| G1008            | <i>ΔligD ΔriboB niaD1 pyrG1 ΔpopP::riboB ΔpopO::pyrG</i>     | This study                    |
| G1009            | <i>ΔligD niaD1 pyrG1 ΔpopS::bar ΔpopO::pyrG</i>              | This study                    |
| G1010            | <i>ΔligD niaD1 pyrG1 ΔpopO::pyrG ΔpepA::pyrG</i>             | This study                    |
| G1011            | <i>ΔligD ΔriboB niaD1 pyrG1 ΔpopP::riboB ΔpepA::pyrG</i>     | This study                    |
| G1012            | <i>ΔligD niaD1 pyrG1 ΔpopS::bar ΔpepA::pyrG</i>              | This study                    |
| G1013            | <i>ΔligD niaD1 pyrG1 ΔpopS::bar ΔpopP</i>                    | This study                    |
| G1060            | G809, <i>ΔpopS::bar [niaD<sup>t</sup> popS::mCherry]</i>     | This study                    |
| G1061            | G816, <i>ΔpopO::pyrG [niaD<sup>t</sup> popO::mCherry]</i>    | This study                    |
